# Supplementary material
Source: Springer Nature journal article supplement (https://www.springermedizin.de/resource/supplementary/12968_2013_3310_MOESM2_ESM.pdf/9583590)

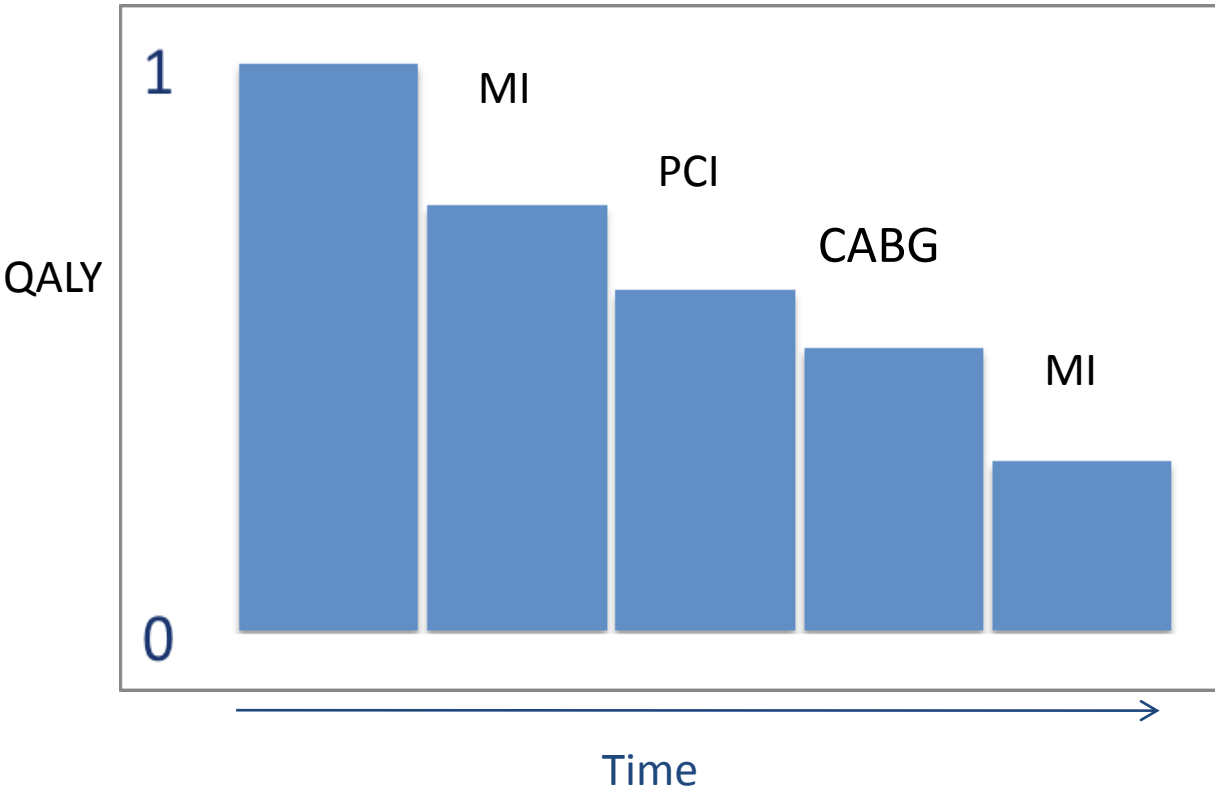

Utility weights  
AMI = 0.87  
CABG = 0.97  
PCI = 0.99  
Death = 0

Supplement: MOESM2 [file 9583590]
